# Supplementary material for: Acid-reagent-engineered tunable multicolor carbon dots via solid-phase pyrolysis for advanced information encryption and anti-counterfeiting
Source: Royal Society of Chemistry journal article supplement (doi:10.1039/d5tc03814f), 2025-12-01
Supplement: d5tc03814f1.pdf [file d5tc03814f1.pdf]

1 Supplementary Material

2

3 **Acid-reagent-engineered tunable multicolor carbon dots via solid-**  
4 **phase pyrolysis for advanced information encryption and anti-**  
5 **counterfeiting**

6 Jin Chai,<sup>[a]</sup> Caiqin Su,<sup>[a]</sup> Yide Han,<sup>[a]</sup> Wenhao Li,<sup>[a]</sup> Nan Wang,<sup>[b]</sup> Wengao Zhang,<sup>[c]</sup> Xia  
7 Zhang<sup>\*[a]</sup>

---

8 [a] J. Chai, Y. Han, W. Li, X. Zhang

9 Department of Chemistry, College of Sciences

10 Northeastern University

11 No.3-11 Wenhua Road, Heping District, Shenyang, 110819, P. R. China

12 E-mail: xzhang@mail.neu.edu.cn

13 [b] N. Wang

14 Analytical and Testing Center

15 Northeastern University

16 No.3-11 Wenhua Road, Heping District, Shenyang, 110819, P. R. China

17 E-mail: wangnan001050@163.com

18 [c] W. Zhang

19 School of Materials Science and Engineering

20 Southern University of Science and Technology

21 No. 1088 Xueyuan Boulevard, Nanshan District, Shenzhen, 518055, P. R. China

22 E-mail: 1435669101@qq.com

23

24

25

26

27

28

29

30

31

32

33

34

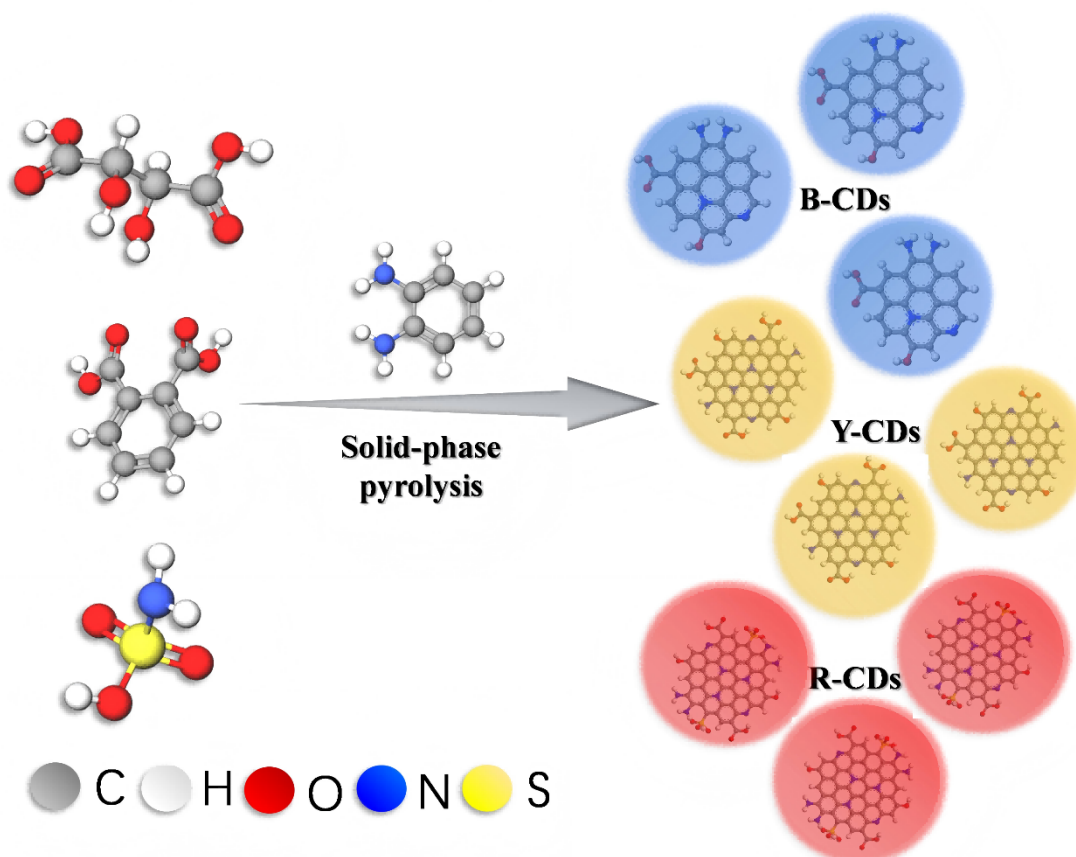

35

36 Fig. S1 Illustration of the synthesis of three CDs.

37

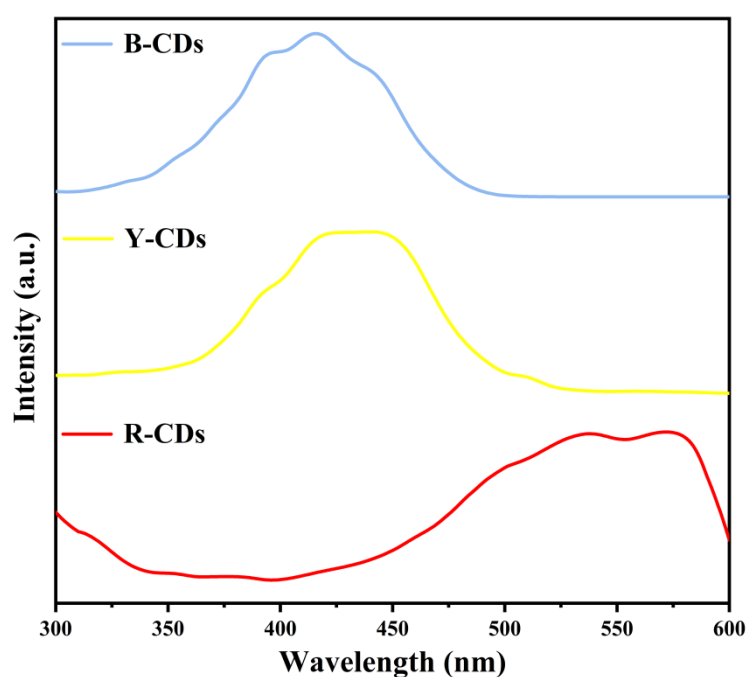

38

39 Fig. S2 PL excitation spectra of B-CDs, Y-CDs, and R-CDs.

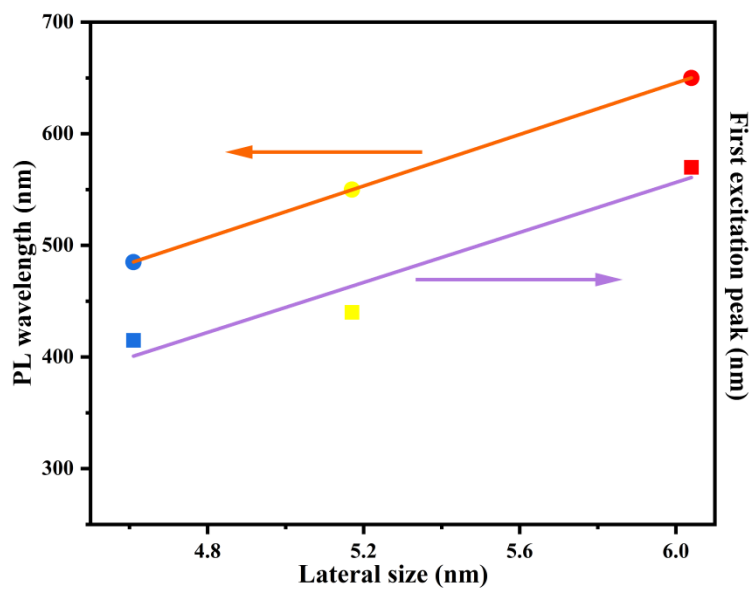

40  
 41 Fig. S3 Dependence of the PL wavelength and first excitonic absorption band on the  
 42 particle size of CDs.

43

44

45

46

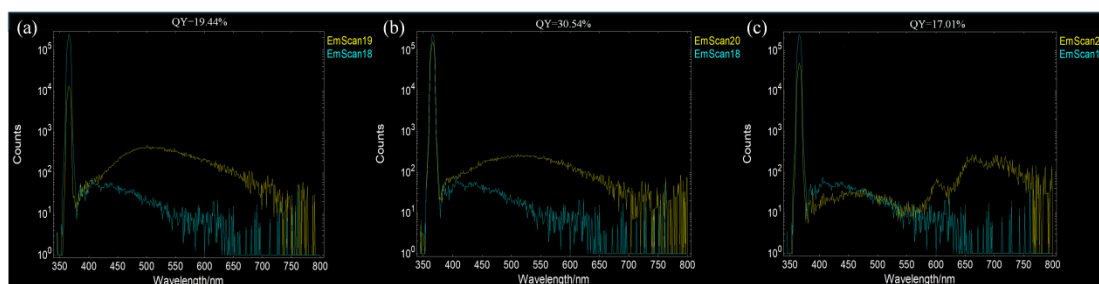

47  
 48 Fig. S4 The photoluminescence quantum efficiency of B-CDs (a), Y-CDs (b), and R-  
 49 CDs (c).

50

51

52

53

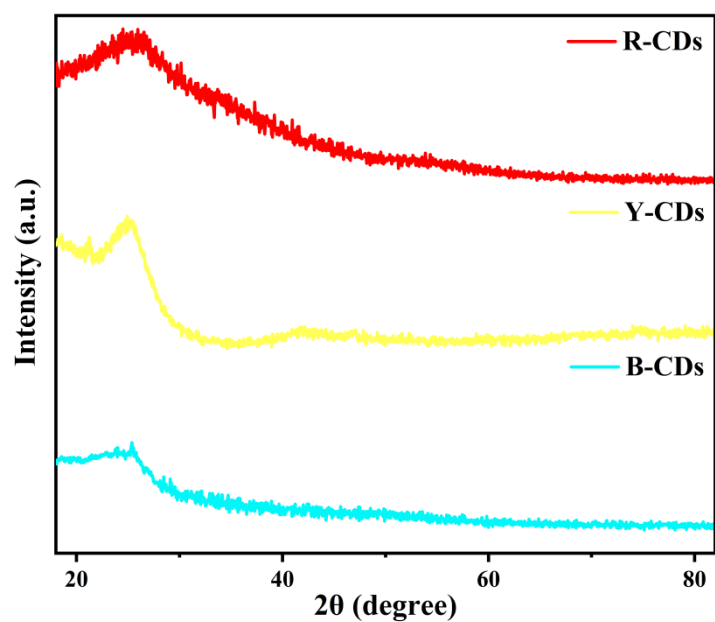

Fig. S5 The XRD patterns of B-CDs, Y-CDs and R-CDs.

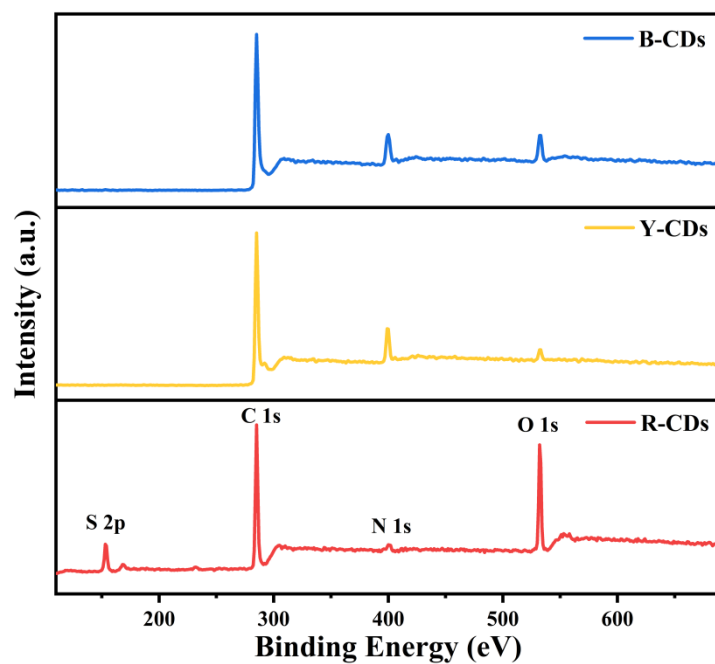

Fig. S6 Full-survey X-ray photoelectron spectroscopy (XPS) spectra of B-CDs, Y-CDs and R-CDs.

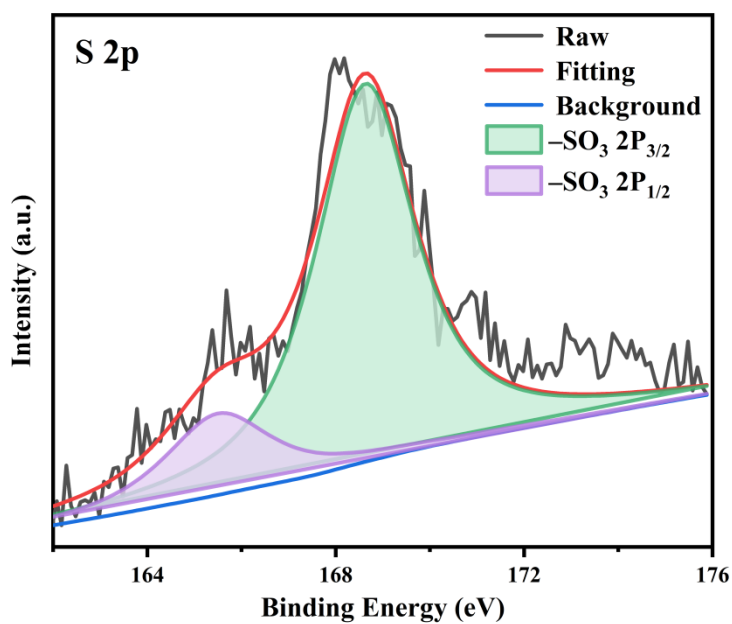

64

65 Fig. S7 High-resolution XPS spectra of S 2P of R-CDs.

66

67

68

69

70

71

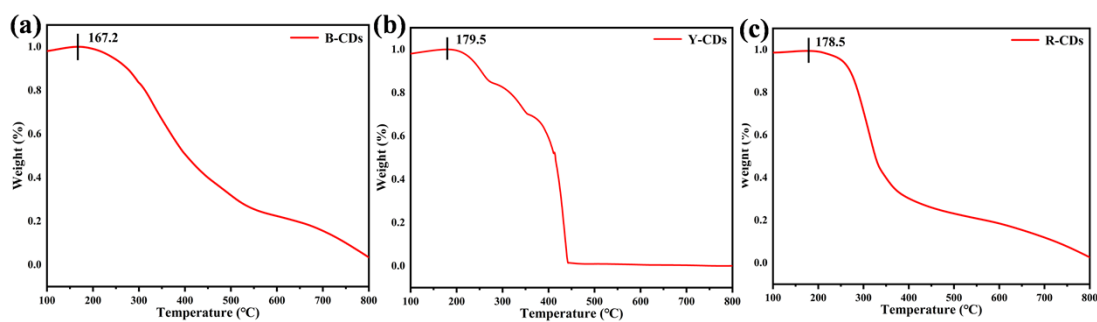

72

73 Fig. S8 Thermogravimetric analysis (TGA) of B-CDs, Y-CDs, and R-CDs.

74

75

76

77

78

79

80

81 **Table**

82 Table S1 Table of fitting parameters for fluorescence lifetime of three CDs.

| Sample | $\tau_1$ (ns) | $B_1$  | $\tau_2$ (ns) | $B_2$  | $\tau_{\text{int}}$ (ns) |
|--------|---------------|--------|---------------|--------|--------------------------|
| B-CDs  | 2.70          | 312.42 | 8.55          | 244.24 | 6.87                     |
| Y-CDs  | 0.84          | 602.57 | 6.11          | 75.73  | 3.35                     |
| R-CDs  | 1.41          | 560.89 | 4.03          | 52.84  | 1.97                     |

83

84

85 Table S2 Contents of C–C/C=C, C–N/C–O, and C=O bonds in the three CDs.

| Sample | C–C/C=C | C–N/C–O | C=O    |
|--------|---------|---------|--------|
| B-CDs  | 44.54%  | 44.81%  | 10.65% |
| Y-CDs  | 46.94%  | 41.94%  | 11.12% |
| R-CDs  | 50.99%  | 42.14%  | 6.87%  |

86

87 Table S3 Contents of Pyridinic N, Pyrrolic N, Graphitic N, and Amino N in the three

88 CDs.

| Sample | Pyridinic N | Pyrrolic N | Graphitic N | Amino N |
|--------|-------------|------------|-------------|---------|
| B-CDs  | 24.40%      | 24.87%     | 19.18%      | 31.53%  |
| Y-CDs  | 23.48%      | 24.30%     | 30.58%      | 21.64%  |
| R-CDs  | 15.53%      | 25.41%     | 39.16%      | 19.90%  |

89

90 Table S4 Contents of C–O, C=O, and S–O/S=O bonds in the three CDs.

| Sample | C–O    | C=O    | S–O/S=O |
|--------|--------|--------|---------|
| B-CDs  | 64.07% | 35.93% | ——      |
| Y-CDs  | 59.83% | 40.17% | ——      |
| R-CDs  | 47.99% | 30.98% | 21.03%  |

91

92

93 Table S5 The HOMO-LUMO energy levels, the energy gap ( $\Delta E$ ), and the  
94 corresponding predicted emission wavelength (based on the  $\Delta E$ ).

| Mode | HOMO  | LUMO  | $\Delta E$ | $\lambda$ (nm) |
|------|-------|-------|------------|----------------|
| A    | -4.96 | -2.33 | 2.64       | 470.58         |
| B    | -4.68 | -2.76 | 1.92       | 644.72         |
| C    | -4.67 | -2.65 | 2.02       | 613.70         |
| D    | -4.65 | -2.64 | 2.01       | 615.52         |
| E    | -5.10 | -3.43 | 1.68       | 739.52         |

95
